# Supplementary material for: Second-generation piperazine derivatives as promising radiation countermeasures
Source: Royal Society of Chemistry journal article supplement (doi:10.1039/d4md00311j), 2024-01-01

## Supplementary Material

### Second-generation piperazine derivatives as promising radiation countermeasures

#### Authors:

Vojtěch Chmil<sup>a</sup>, Natálie Živná<sup>b,c</sup>, Marcela Milanová<sup>a</sup>, Alžběta Filipová<sup>a</sup>, Jaroslav Pejchal<sup>b</sup>, Lukáš Prchal<sup>c</sup>, Darina Muthná<sup>d</sup>, Vít Řeháček<sup>e</sup>, Martina Řezáčová<sup>d</sup>, Jan Marek<sup>c,f</sup>, Aleš Tichý<sup>a,c</sup>, Radim Havelek<sup>d\*</sup>

\* Corresponding author: e-mail: havelekr@lfhk.cuni.cz

#### Affiliations:

<sup>a</sup>Department of Radiobiology, Military Faculty of Medicine, University of Defence in Brno, Trebesska 1575, 500 05 Hradec Kralove, Czech Republic

<sup>b</sup>Department of Toxicology and Military Pharmacy, Military Faculty of Medicine, University of Defence in Brno, Trebesska 1575, 500 05 Hradec Kralove, Czech Republic

<sup>c</sup>Biomedical Research Centre, University Hospital Hradec Kralove, Sokolska 581, 500 05 Hradec Kralove, Czech Republic

<sup>d</sup>Department of Medical Biochemistry, Faculty of Medicine in Hradec Kralove, Charles University, Simkova 870, 500 03 Hradec Kralove, Czech Republic

<sup>e</sup>Transfusion Center, University Hospital Hradec Kralove, Sokolska 581, 500 05 Hradec Kralove – Novy Hradec Kralove, Czech Republic

<sup>f</sup>Department of Epidemiology, Military Faculty of Medicine, University of Defence in Brno, Trebesska 1575, 500 05 Hradec Kralove, Czech Republic

**Supplementary Fig. 1.** Proliferation of individual cell lines exposed to the compounds at 100  $\mu$ M for 48 h. All data are an average of at least three independent measurements  $\pm$  standard deviation.

|        | Average viability (%) |            |              |              |              |              |              |              |            |             |
|--------|-----------------------|------------|--------------|--------------|--------------|--------------|--------------|--------------|------------|-------------|
|        | WR2721                | WR1065     | 1            | 2            | 3            | 4            | 5            | 6            | 7          | 8           |
| Jurkat | 10 $\pm$ 12           | 1 $\pm$ 0  | 91 $\pm$ 2   | 98 $\pm$ 3   | 92 $\pm$ 4   | 100 $\pm$ 3  | 85 $\pm$ 3   | 89 $\pm$ 5   | 2 $\pm$ 0  | 28 $\pm$ 4  |
| MOLT-4 | 71 $\pm$ 21           | 3 $\pm$ 3  | 92 $\pm$ 8   | 90 $\pm$ 7   | 84 $\pm$ 11  | 102 $\pm$ 16 | 84 $\pm$ 8   | 89 $\pm$ 16  | 6 $\pm$ 5  | 41 $\pm$ 8  |
| A549   | 5 $\pm$ 0             | 3 $\pm$ 0  | 112 $\pm$ 8  | 111 $\pm$ 11 | 106 $\pm$ 11 | 112 $\pm$ 14 | 109 $\pm$ 9  | 99 $\pm$ 11  | 6 $\pm$ 2  | 92 $\pm$ 12 |
| HT-29  | 27 $\pm$ 3            | 20 $\pm$ 2 | 141 $\pm$ 42 | 103 $\pm$ 3  | 94 $\pm$ 9   | 99 $\pm$ 3   | 95 $\pm$ 6   | 85 $\pm$ 7   | 12 $\pm$ 2 | 33 $\pm$ 3  |
| PANC-1 | 8 $\pm$ 4             | 3 $\pm$ 1  | 108 $\pm$ 3  | 104 $\pm$ 3  | 90 $\pm$ 4   | 97 $\pm$ 1   | 100 $\pm$ 3  | 94 $\pm$ 3   | 55 $\pm$ 6 | 101 $\pm$ 2 |
| MCF-7  | 7 $\pm$ 2             | 2 $\pm$ 0  | 100 $\pm$ 9  | 97 $\pm$ 8   | 91 $\pm$ 12  | 102 $\pm$ 5  | 104 $\pm$ 11 | 86 $\pm$ 12  | 7 $\pm$ 7  | 41 $\pm$ 7  |
| SAOS-2 | 9 $\pm$ 3             | 7 $\pm$ 4  | 101 $\pm$ 16 | 103 $\pm$ 9  | 92 $\pm$ 14  | 102 $\pm$ 6  | 89 $\pm$ 3   | 120 $\pm$ 26 | 15 $\pm$ 5 | 42 $\pm$ 5  |
| MRC-5  | 8 $\pm$ 4             | 3 $\pm$ 1  | 111 $\pm$ 9  | 105 $\pm$ 1  | 103 $\pm$ 6  | 103 $\pm$ 2  | 98 $\pm$ 3   | 97 $\pm$ 1   | 0 $\pm$ 1  | 15 $\pm$ 10 |

**Supplementary Fig. 2.** Viability in % of PBMCs after 48 h exposure to tested compounds. The viability of untreated control is 100%. All data are an average of at least three independent measurements  $\pm$  standard deviation.

|            | Average viability (%) |             |              |              |             |              |              |             |
|------------|-----------------------|-------------|--------------|--------------|-------------|--------------|--------------|-------------|
| [ $\mu$ M] | WR2721                | WR1065      | 1            | 2            | 3           | 4            | 5            | 6           |
| 0          | 100 $\pm$ 0           | 100 $\pm$ 0 | 100 $\pm$ 0  | 100 $\pm$ 0  | 100 $\pm$ 0 | 100 $\pm$ 0  | 100 $\pm$ 0  | 100 $\pm$ 0 |
| 10         | 93 $\pm$ 17           | 57 $\pm$ 39 | 114 $\pm$ 14 | 102 $\pm$ 12 | 98 $\pm$ 5  | 104 $\pm$ 18 | 121 $\pm$ 25 | 94 $\pm$ 12 |
| 20         | 75 $\pm$ 30           | 47 $\pm$ 34 | 110 $\pm$ 11 | 100 $\pm$ 11 | 95 $\pm$ 14 | 103 $\pm$ 26 | 99 $\pm$ 8   | 96 $\pm$ 5  |
| 50         | 37 $\pm$ 9            | 19 $\pm$ 17 | 111 $\pm$ 15 | 99 $\pm$ 6   | 90 $\pm$ 9  | 112 $\pm$ 30 | 111 $\pm$ 7  | 99 $\pm$ 4  |
| 100        | 33 $\pm$ 12           | 16 $\pm$ 14 | 101 $\pm$ 17 | 98 $\pm$ 8   | 92 $\pm$ 6  | 107 $\pm$ 30 | 102 $\pm$ 9  | 99 $\pm$ 7  |
| 200        | 35 $\pm$ 17           | 21 $\pm$ 8  | 102 $\pm$ 21 | 99 $\pm$ 11  | 92 $\pm$ 5  | 110 $\pm$ 33 | 107 $\pm$ 5  | 96 $\pm$ 6  |
| 500        | 37 $\pm$ 20           | 27 $\pm$ 9  | 97 $\pm$ 22  | 93 $\pm$ 3   | 92 $\pm$ 9  | 110 $\pm$ 28 | 79 $\pm$ 3   | 94 $\pm$ 7  |
| 1000       | n/a                   | n/a         | 60 $\pm$ 10  | 78 $\pm$ 4   | 81 $\pm$ 11 | 105 $\pm$ 10 | 44 $\pm$ 11  | 51 $\pm$ 4  |
| 2000       | n/a                   | n/a         | n/a          | n/a          | n/a         | 53 $\pm$ 5   | n/a          | n/a         |
| 5000       | n/a                   | n/a         | n/a          | n/a          | n/a         | 39 $\pm$ 5   | n/a          | n/a         |

### Supplementary Fig. 3. HRMS analysis of compounds 1 - 8

#### 1-(4-(2-hydroxyethyl)piperazin-1-yl)-3-(2-methoxy-4-nitrophenoxy)propan-2-ol (1)

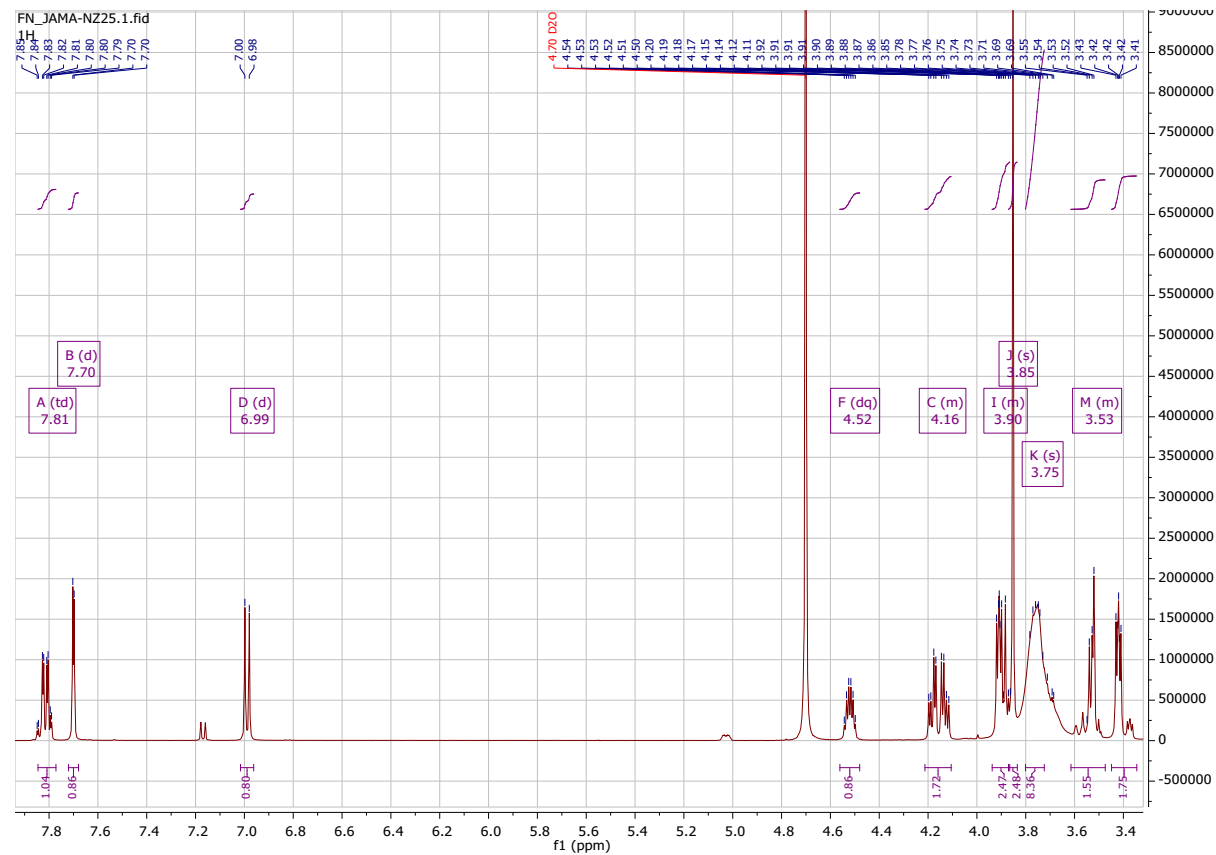

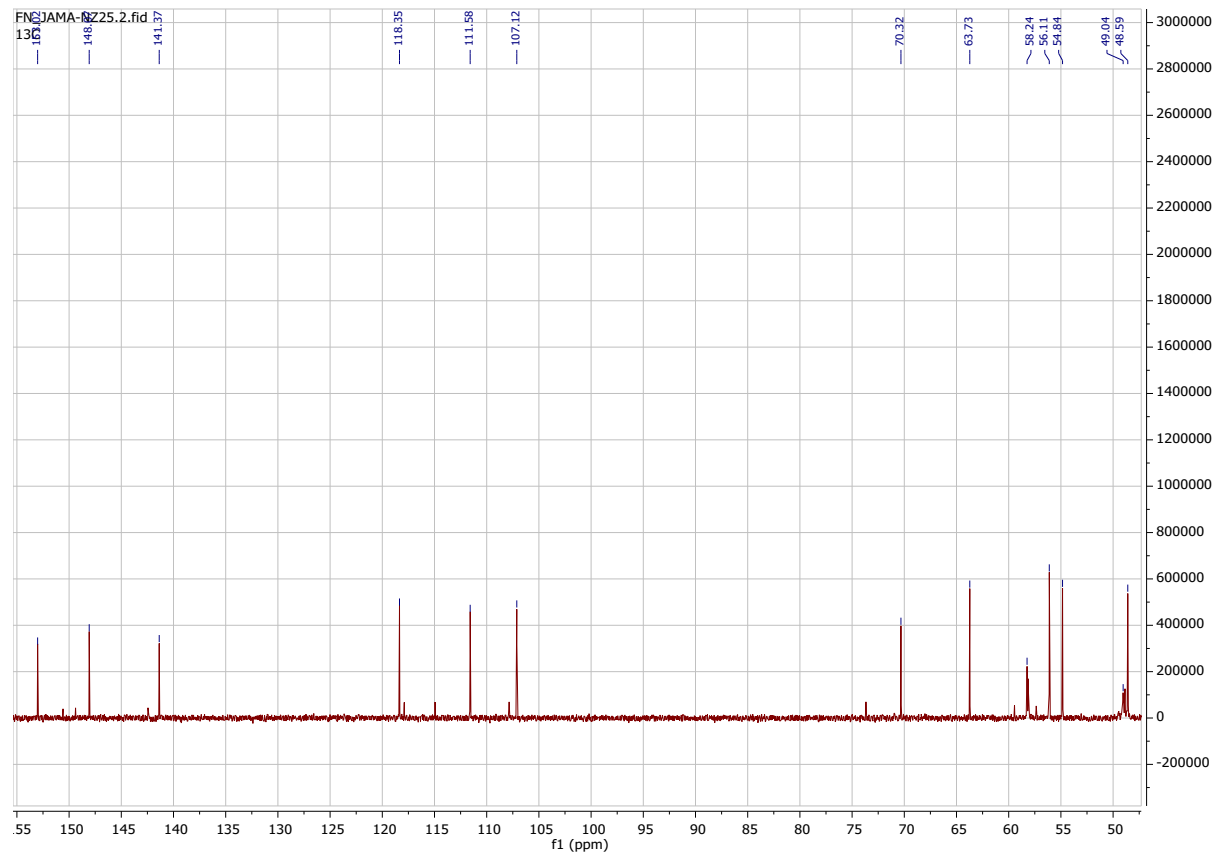

NZ-25\_4 #84 RT: 0.91 AV: 1 NL: 5.51E8  
T: FTMS + p ESI Full ms [105.0000-1000.0000]

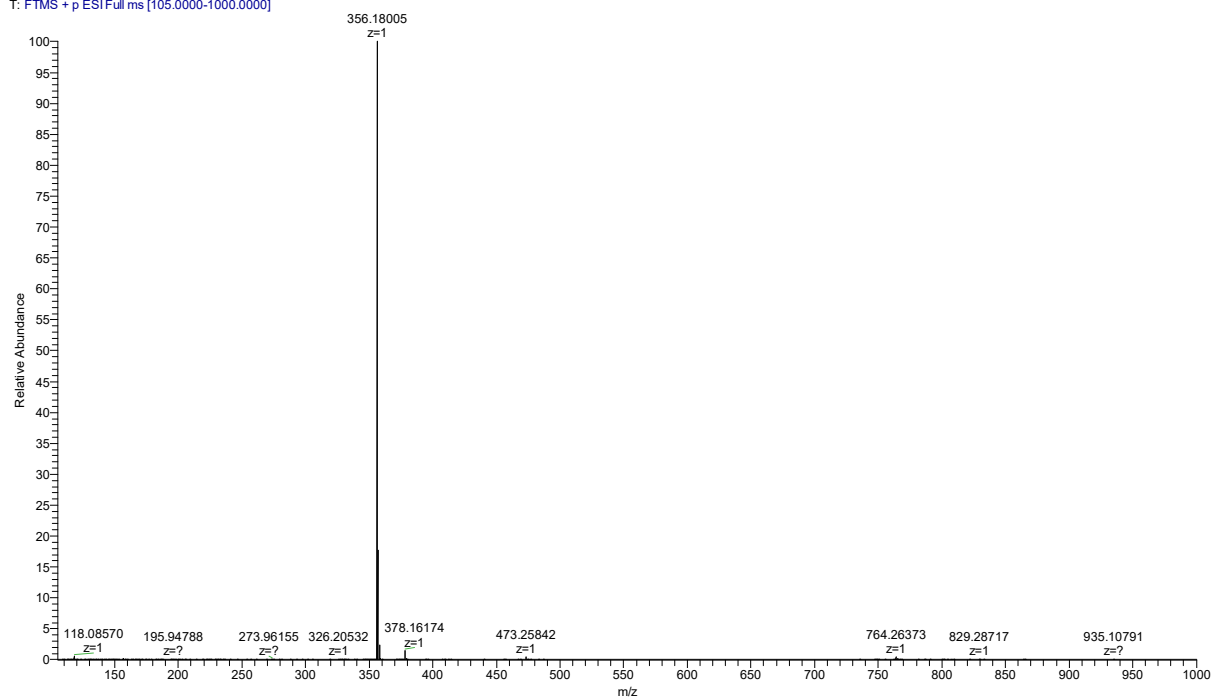

1-(4-(2-hydroxyethyl)piperazin-1-yl)-3-(4-methoxy-2-nitrophenoxy)propan-2-ol (**2**)

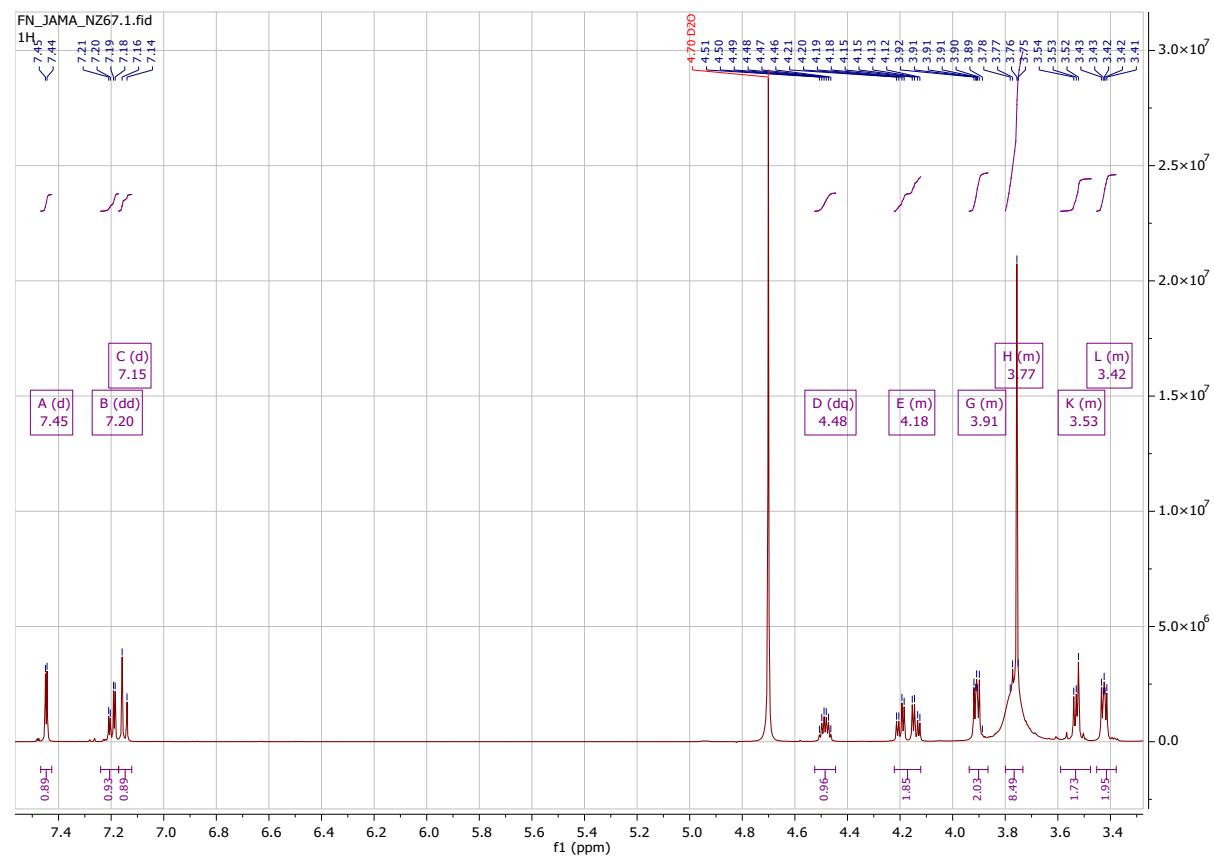

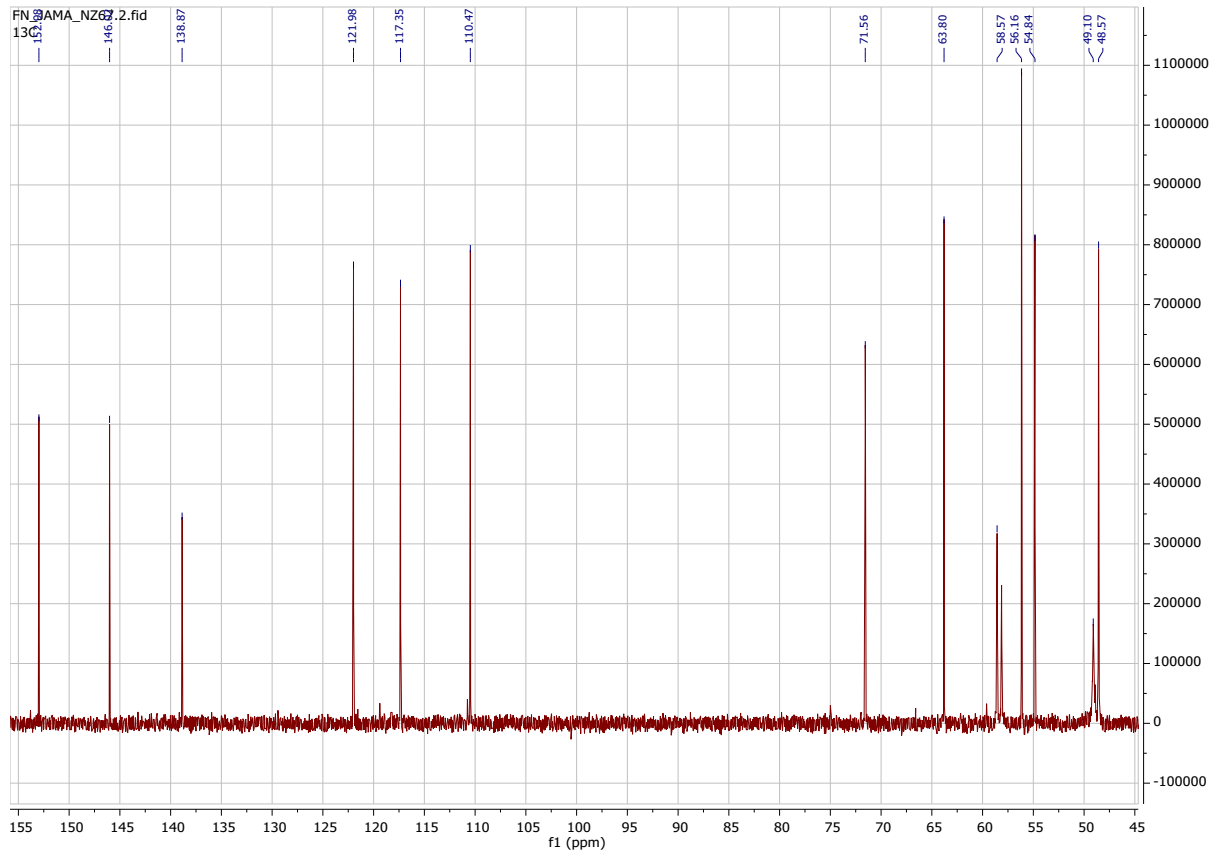

NZ-67\_JM13 #105 RT: 1.07 AV: 1 NL: 1.14E9  
T: FTMS + p ESI Full ms [105.0000-1000.0000]

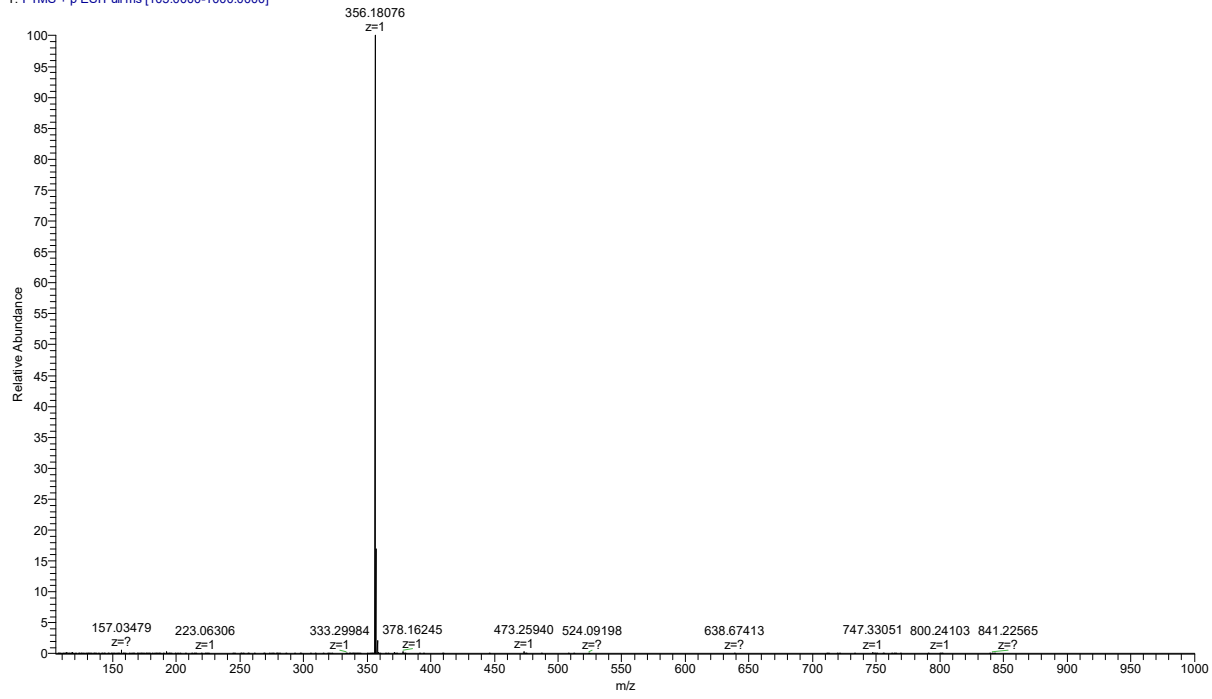



1-(4-(2-hydroxyethyl)piperazin-1-yl)-3-(2-fluoro-4-nitrophenoxy)propan-2-ol (**3**)

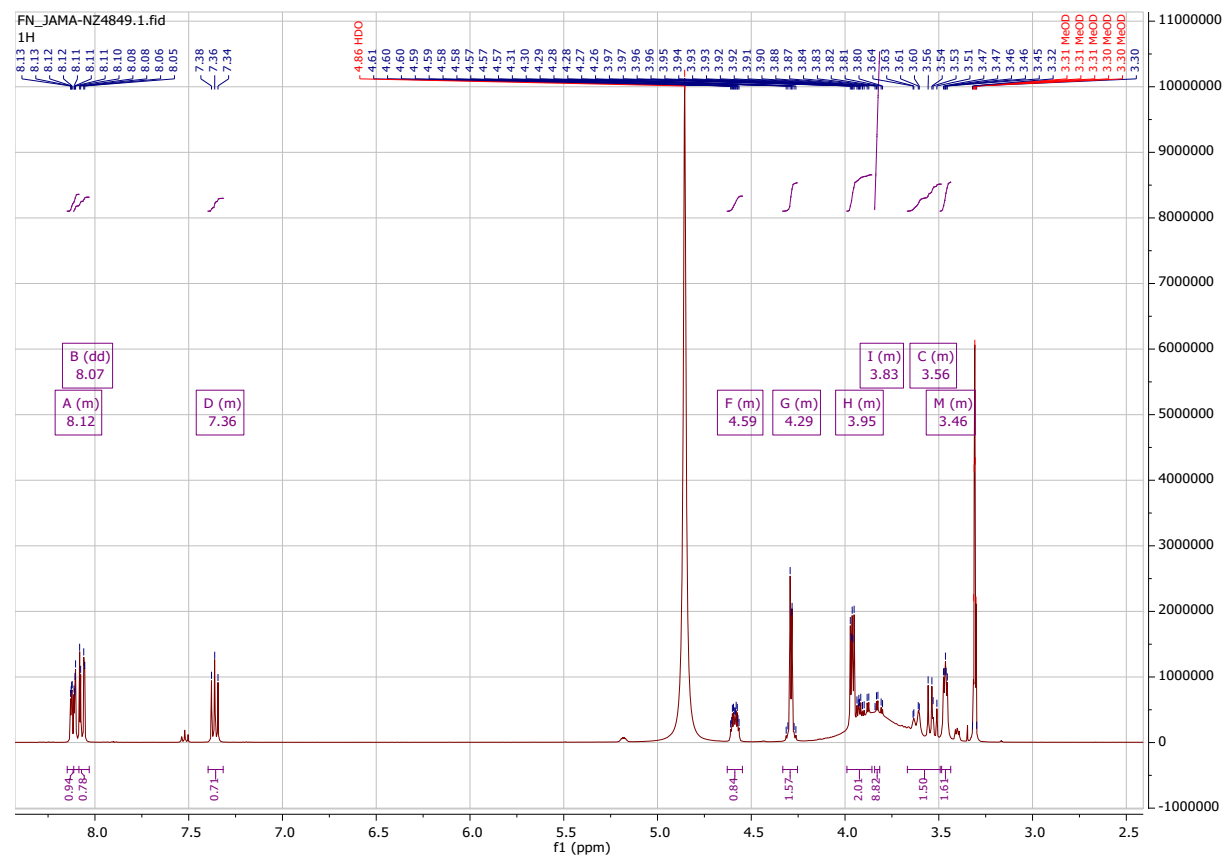

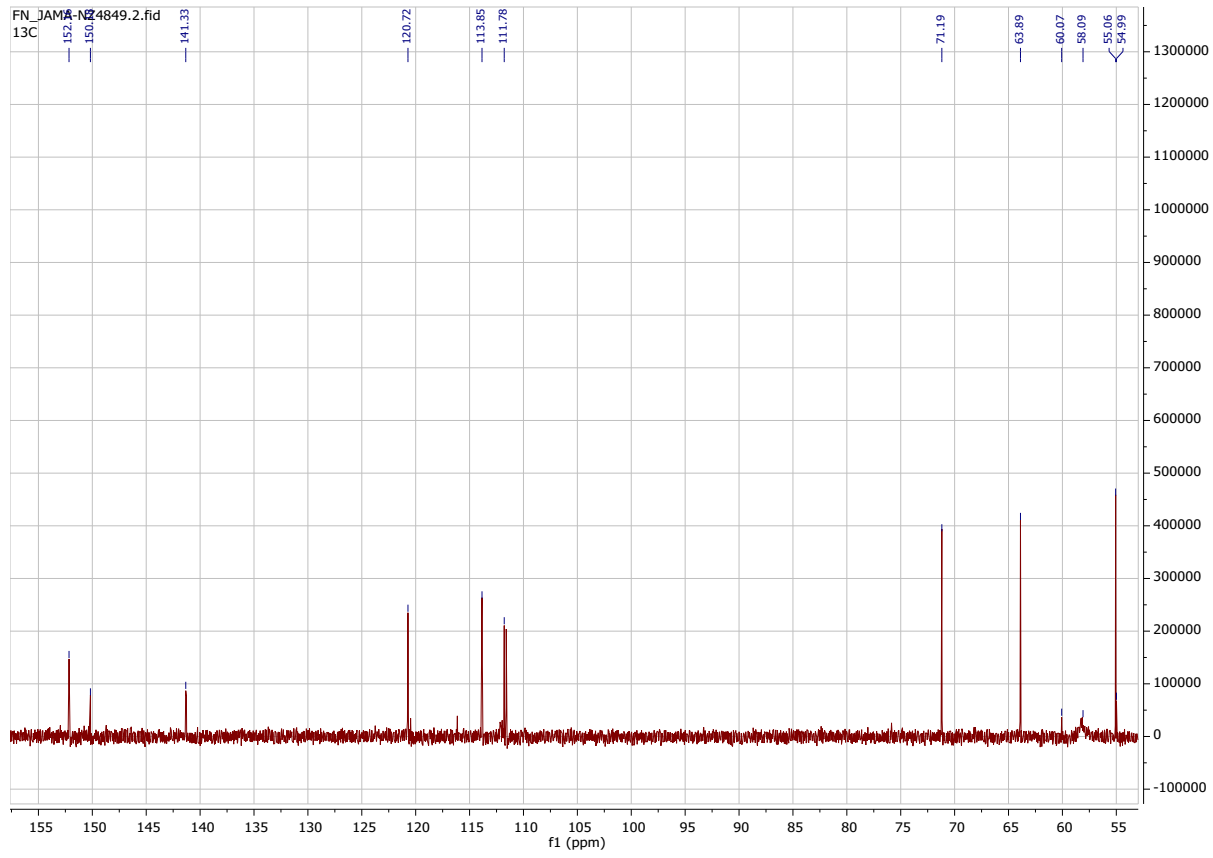

NZ-48\_49\_3\_19-26 #82 RT: 0.83 AV: 1 NL: 1.98E9  
T: FTMS + p ESI Full ms [105.0000-1000.0000]

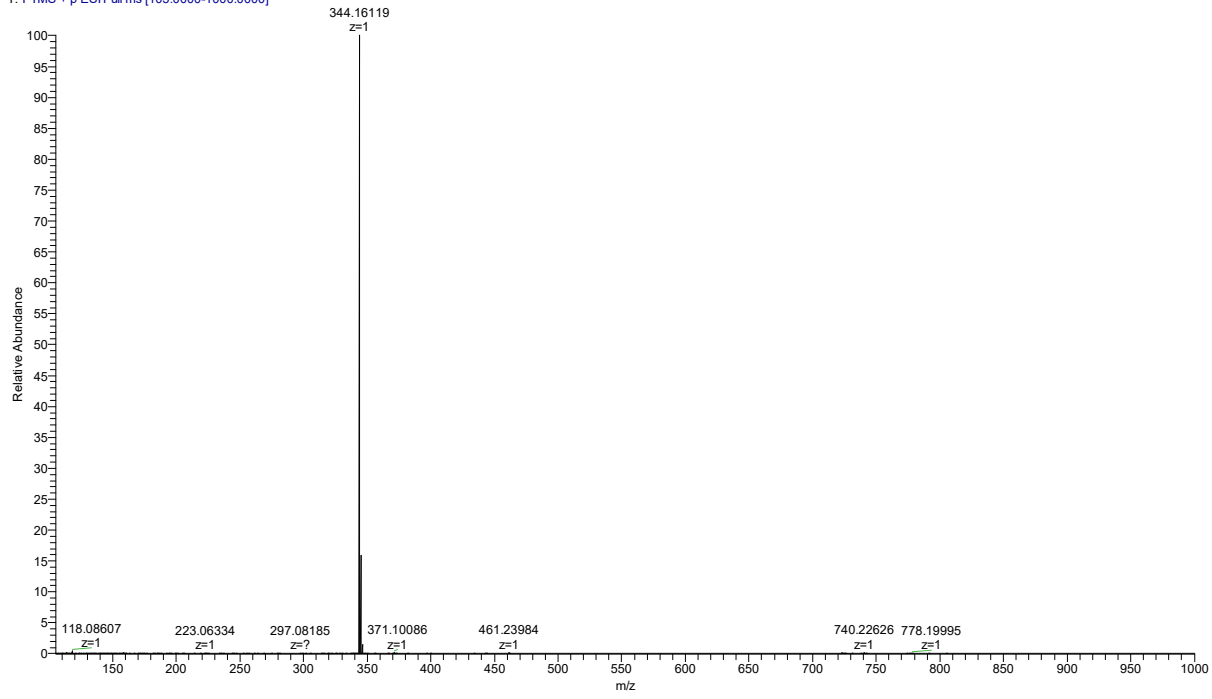

1-(4-(2-hydroxyethyl)piperazin-1-yl)-3-(4-fluorophenoxy)propan-2-ol (4)

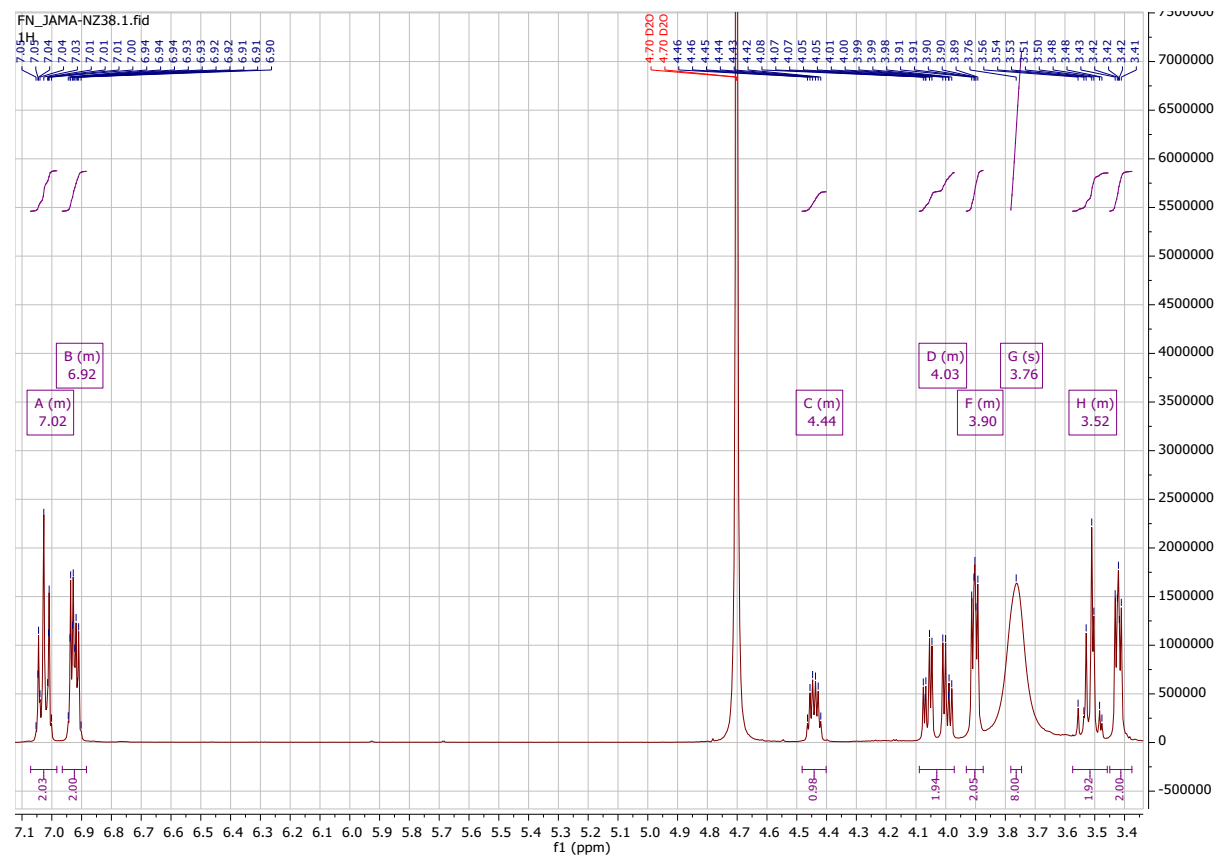

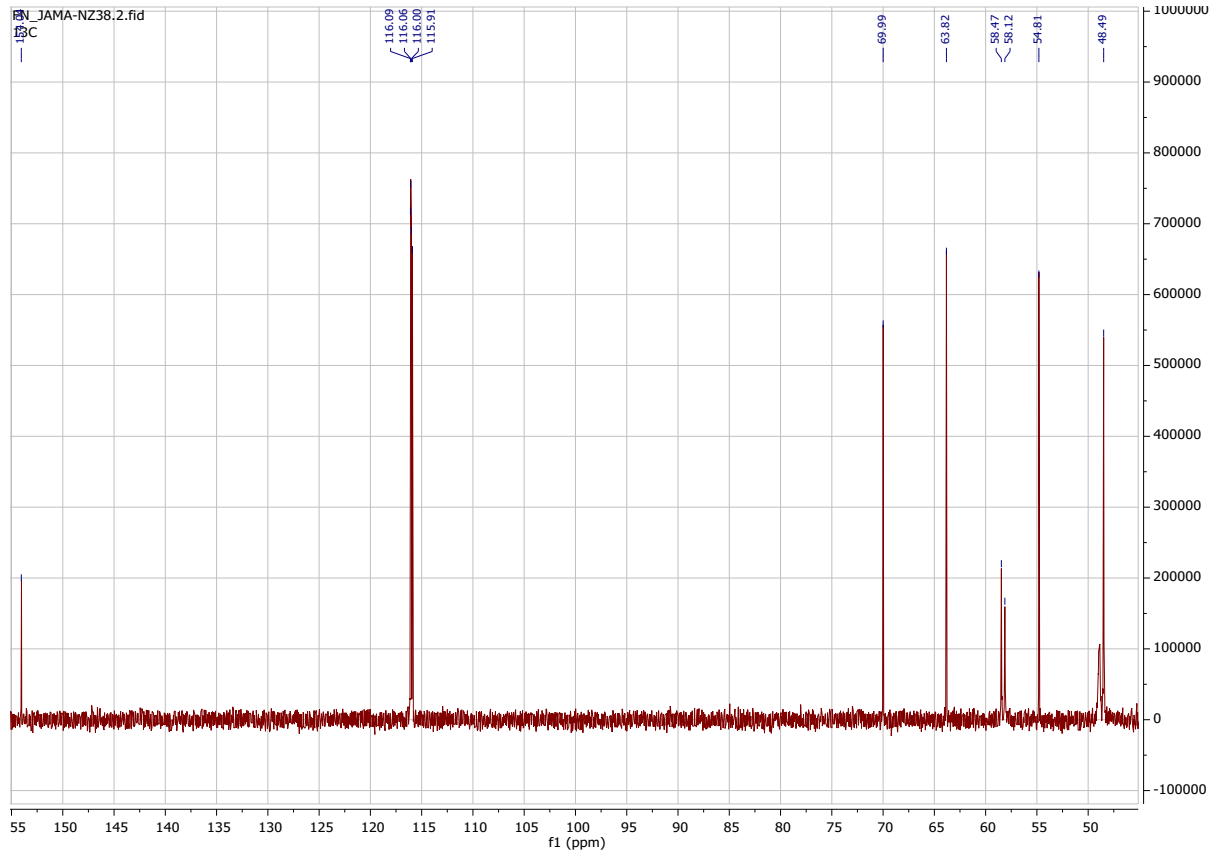

NZ-38\_2 #52 RT: 0.54 AV: 1 NL: 1.02E9  
T: FTMS + p ESI Full ms [105.0000-1000.0000]

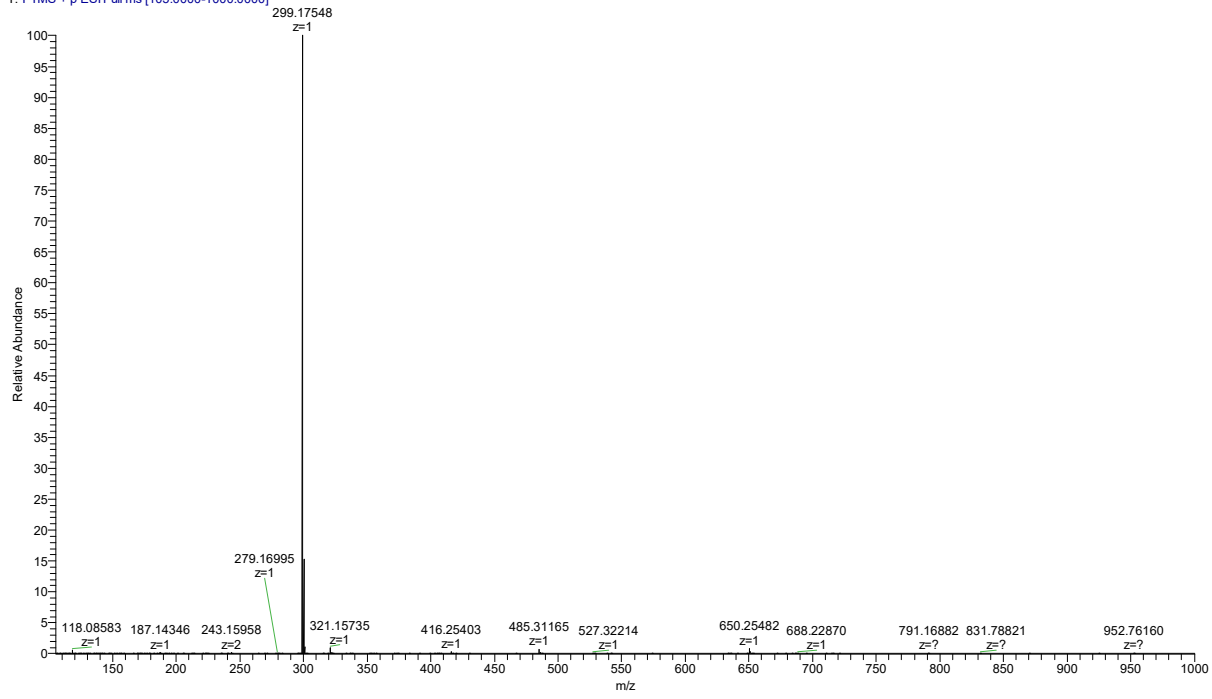

1-(4-(2-hydroxyethyl)piperazin-1-yl)-3-(4-chloro-3-nitrophenoxy)propan-2-ol (5)

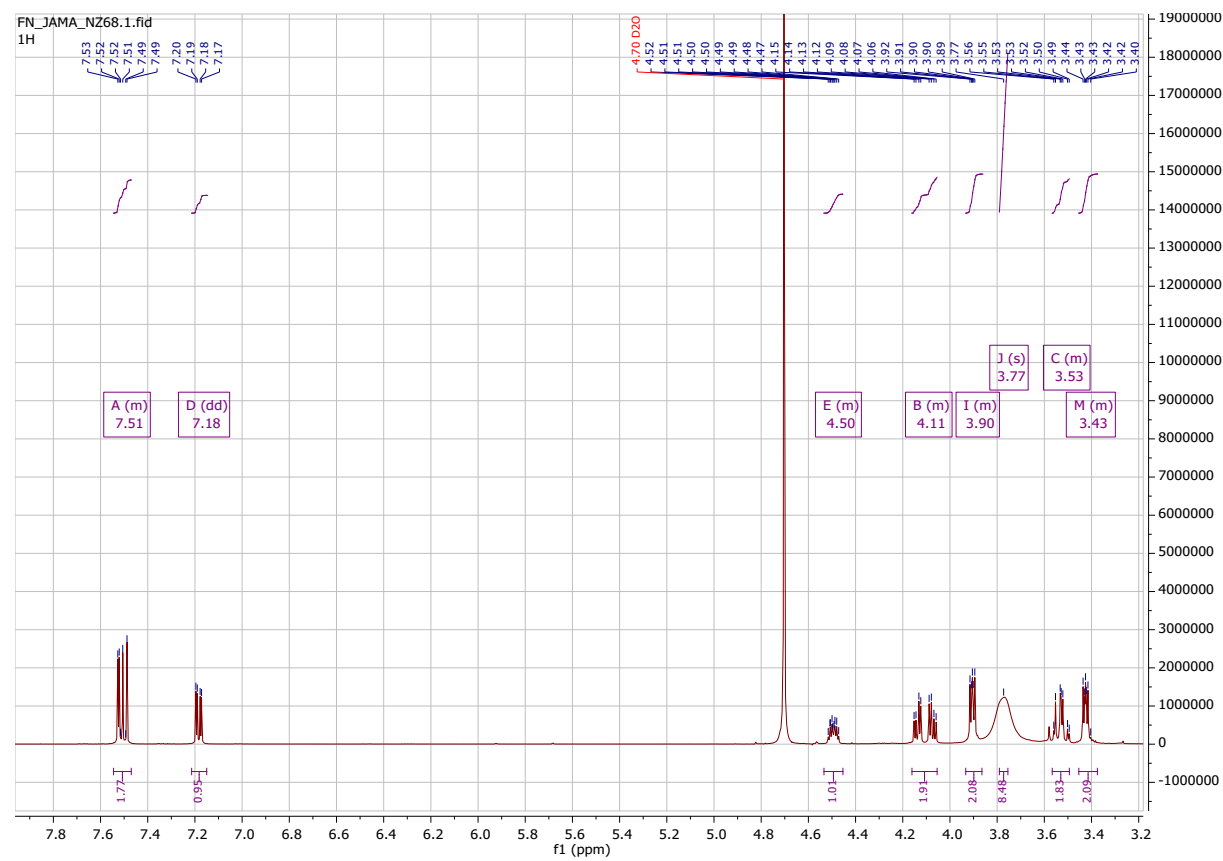

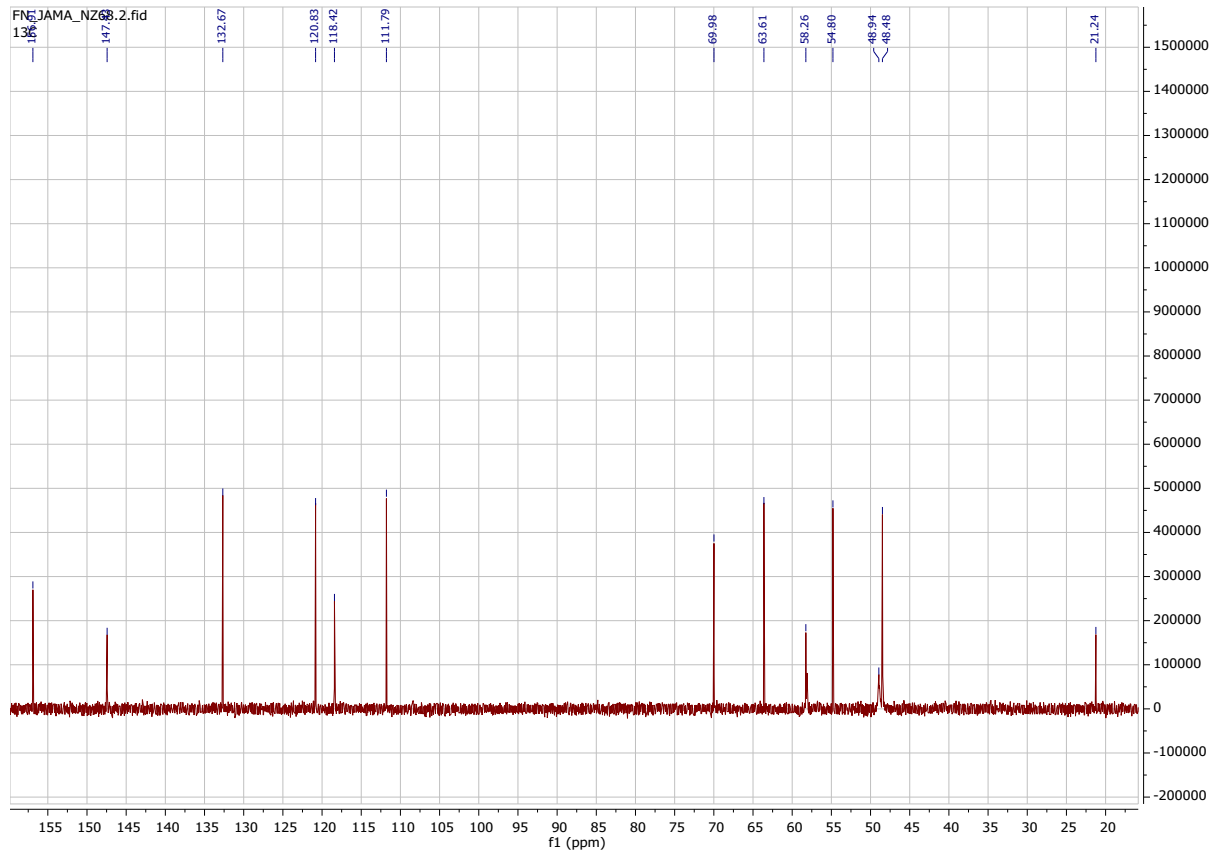



NZ-68\_JM14 #175 RT: 1.82 AV: 1 NL: 7.09E8  
T: FTMS + p ESI Full ms [105.0000-1000.0000]

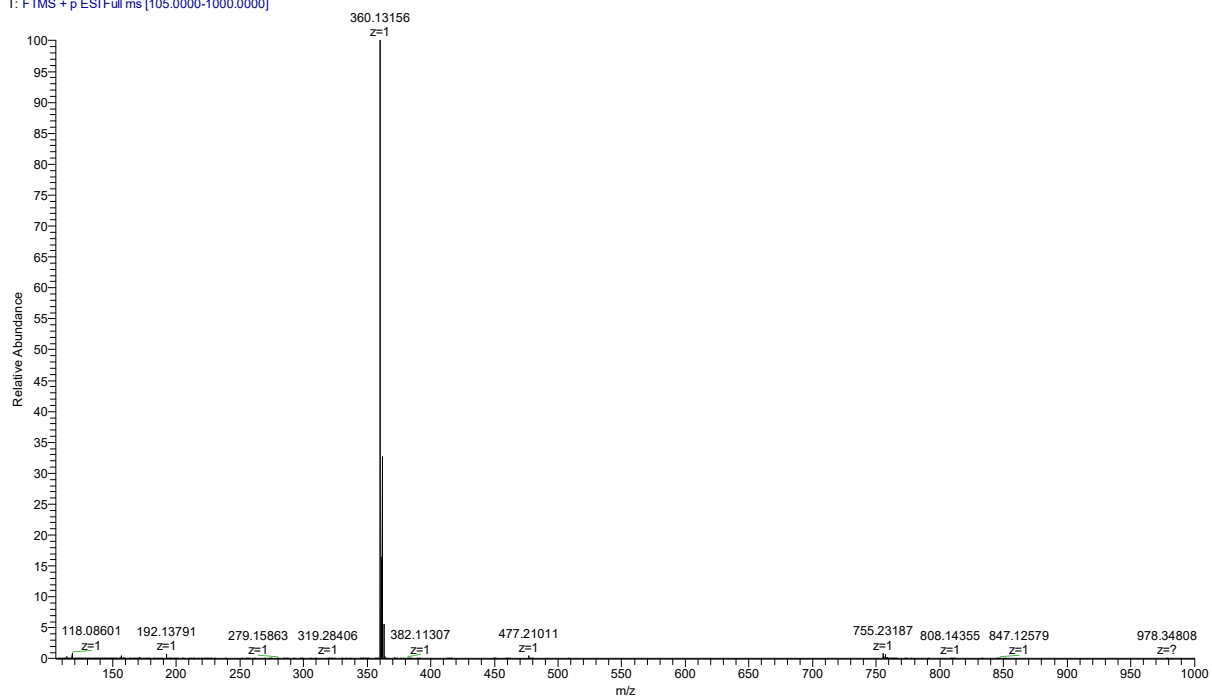

1-(4-(2-hydroxyethyl)piperazin-1-yl)-3-(3-chlorophenoxy)propan-2-ol (6)

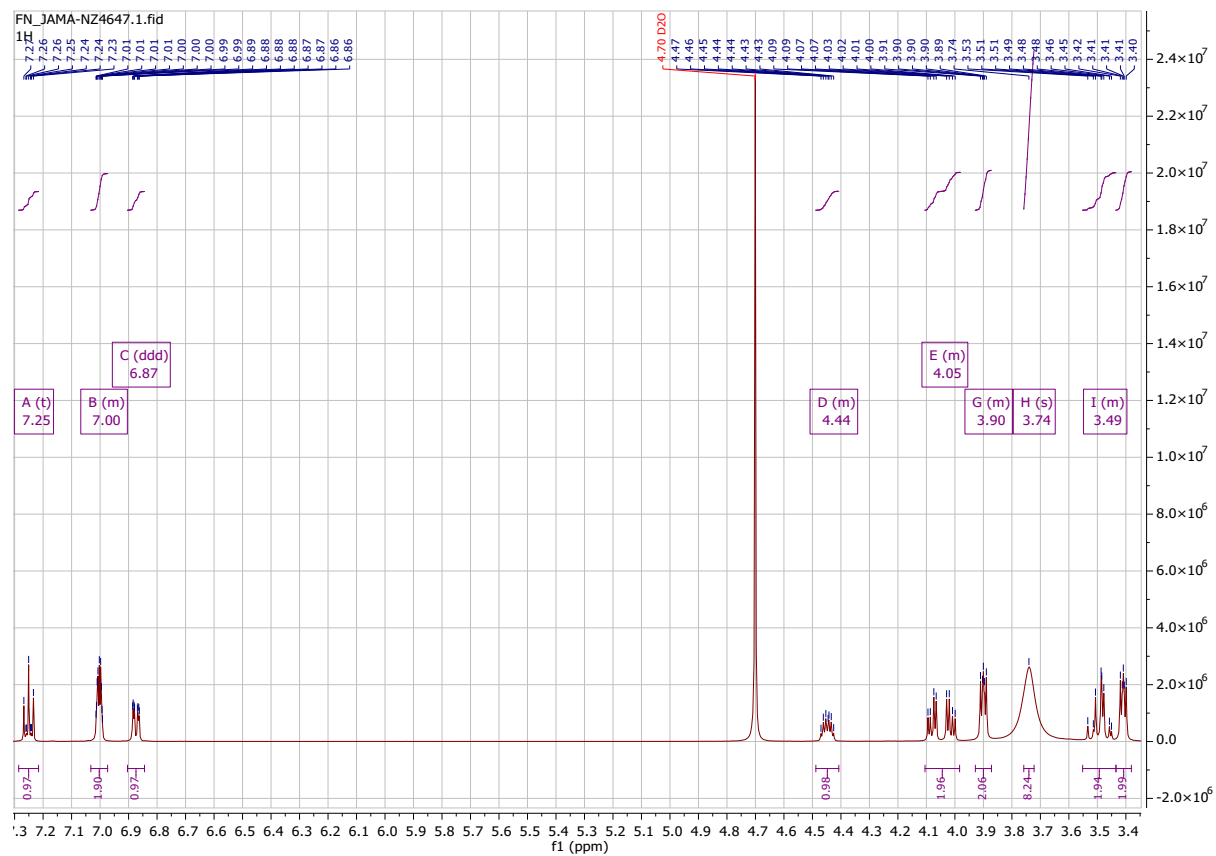

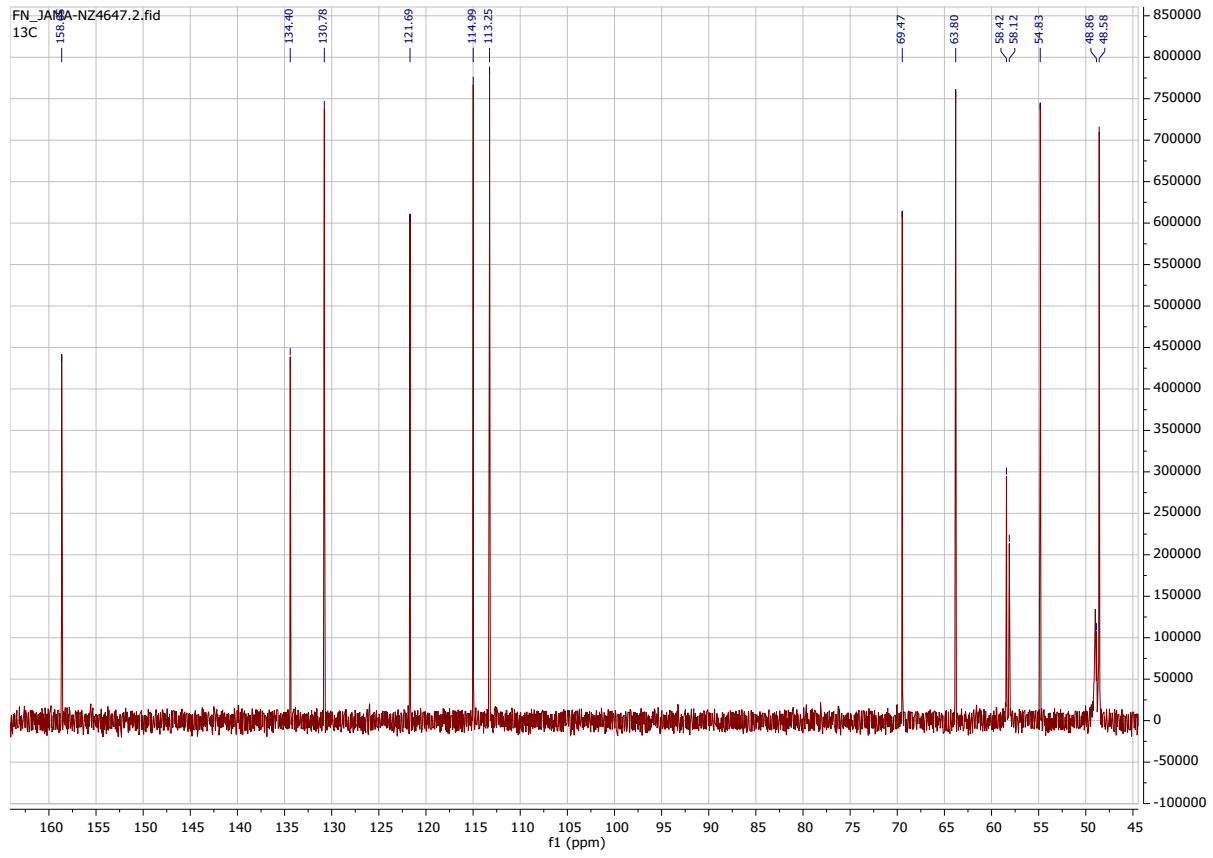

NZ-46\_47\_EA #124 RT: 1.26 AV: 1 NL: 9.84E8  
T: FTMS + p ESI Full ms [105.0000-1000.0000]

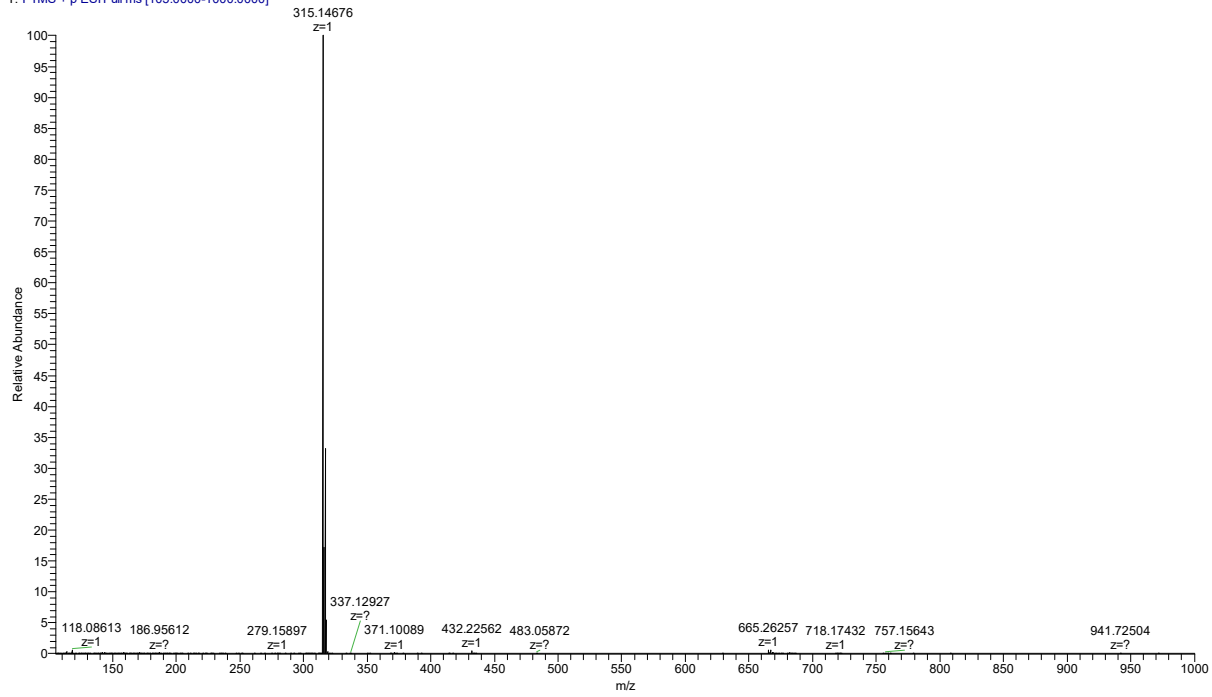

1-(4-(2-hydroxyethyl)piperazin-1-yl)-3-(4-(4-fluorophenoxy)phenoxy)propan-2-ol (7)

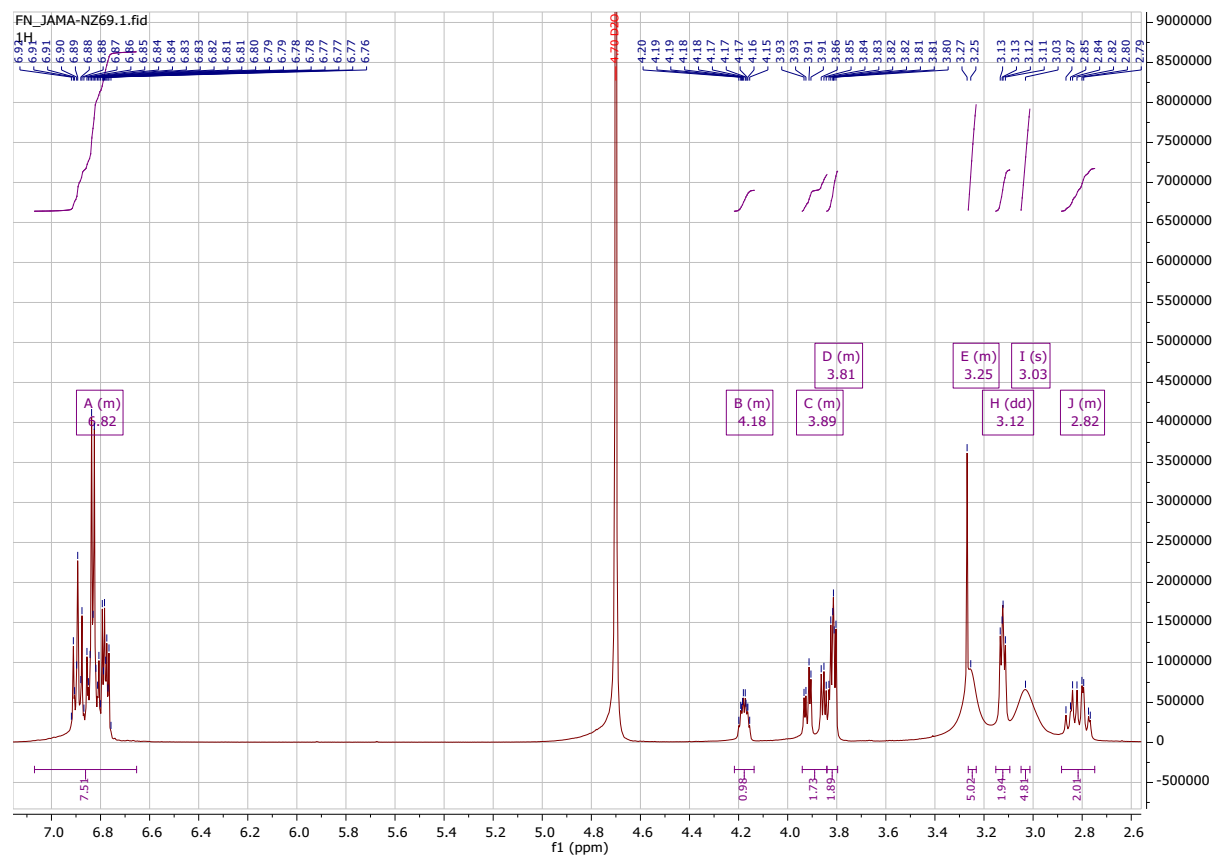

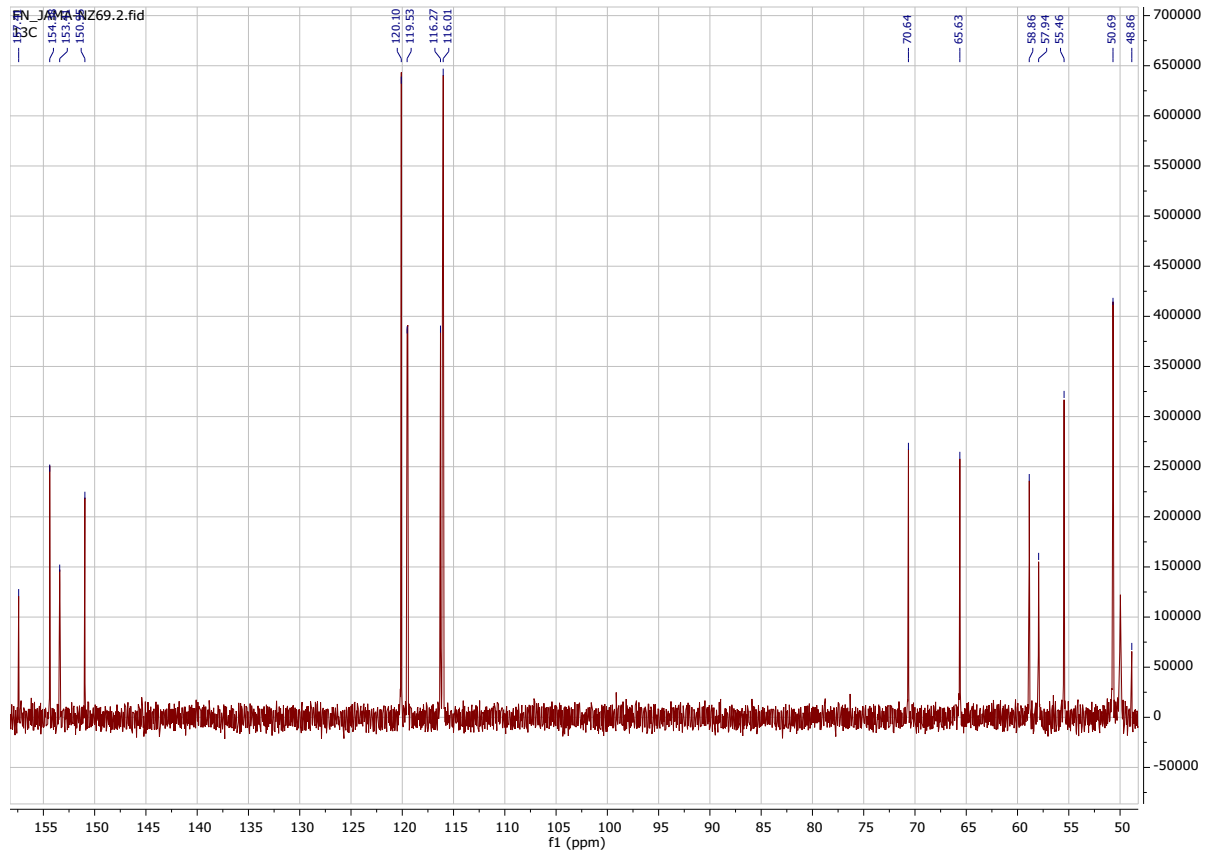

NZ-58\_JM12 #275 RT: 2.90 AV: 1 NL: 5.77E9  
T: FTMS + p ESI Full ms [105.0000-1000.0000]

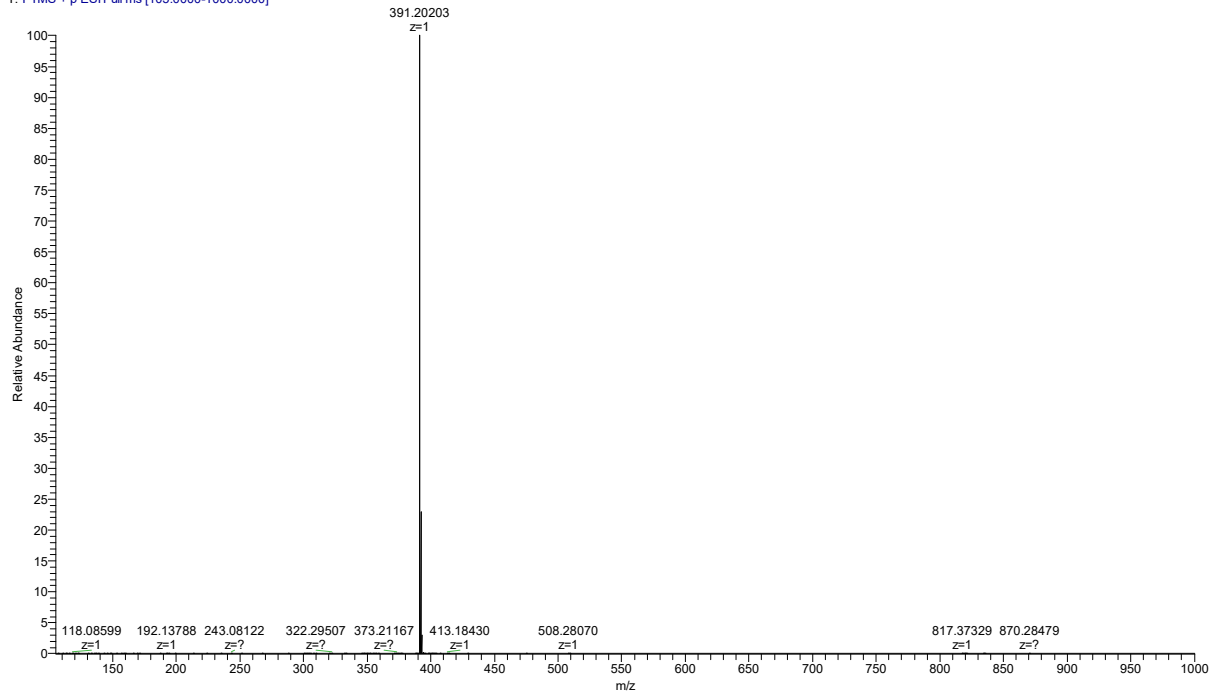

1-(4-(2-hydroxyethyl)piperazin-1-yl)-3-(2,4,5-trichlorophenoxy)propan-2-ol (**8**)

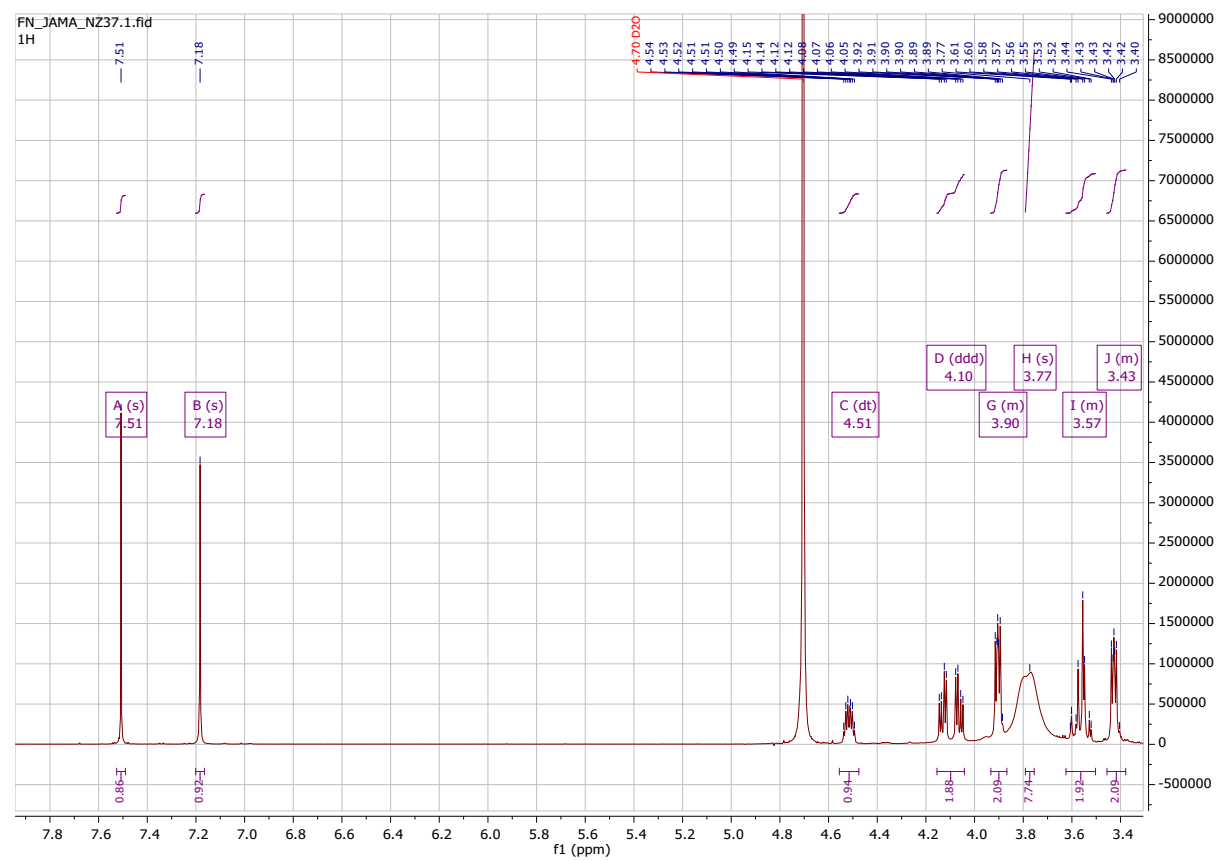



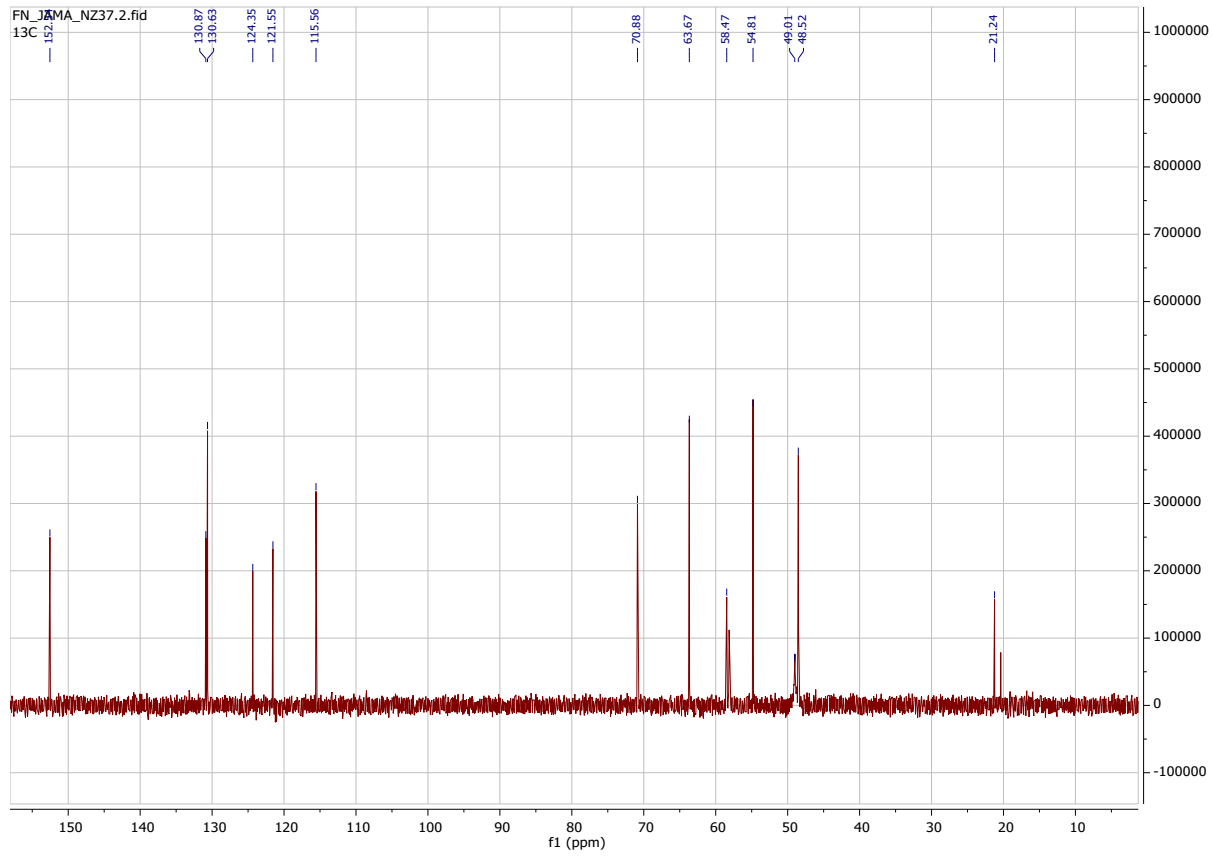

NZ-37 #241 RT: 2.61 AV: 1 NL: 2.71E9  
T: FTMS + p ESI Full ms [105.0000-1000.0000]

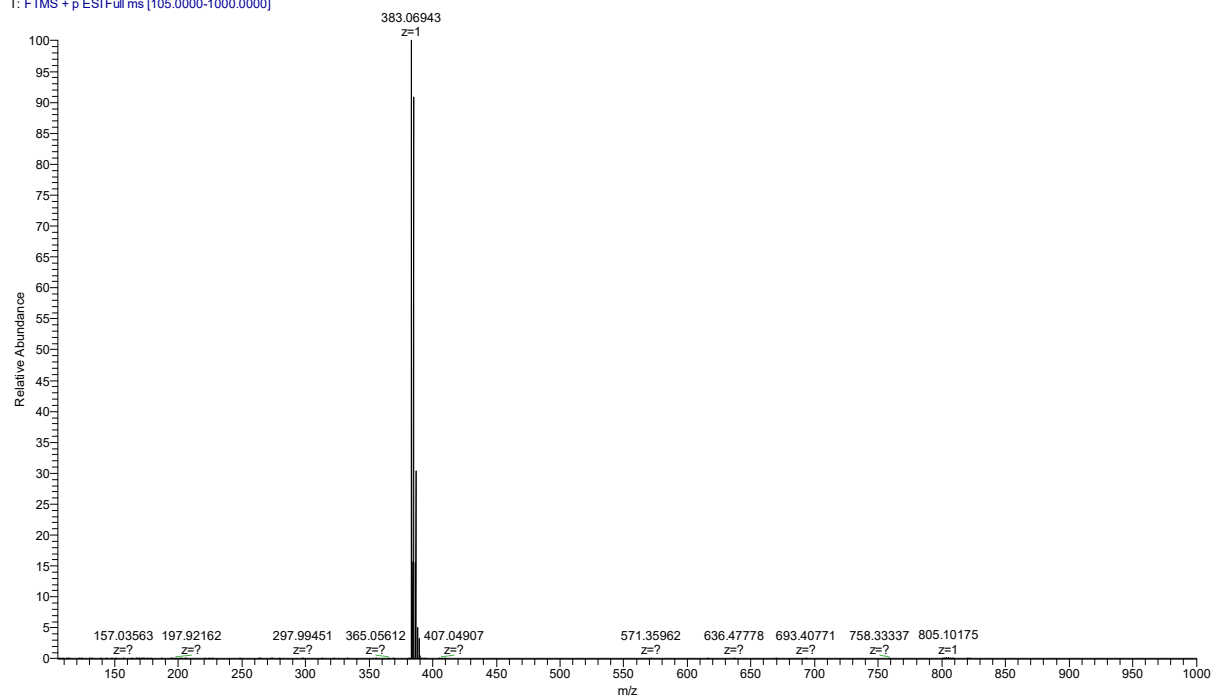

Supplement: d4md00311j1.pdf [file d4md00311j1.pdf]
